# Supplementary material for: Integrating Data From Randomized Controlled Trials and Observational Studies to Assess Survival in Rare Diseases: Insights From Pulmonary Arterial Hypertension
Source: PubMed Central journal article supplement — Circ Cardiovasc Qual Outcomes. 2019 May 21;12(5):e005095. doi: 10.1161/CIRCOUTCOMES.118.005095 (PMC7665498; doi:10.1161/circoutcomes.118.005095), 2019-05-21
Supplement: hcq-12-e005095-s001.pdf [file hcq-12-e005095-s001.pdf]

## SUPPLEMENTAL MATERIAL

### **Integrating data from randomized controlled trials and observational studies to assess survival in rare diseases: Insights from pulmonary arterial hypertension**

Adam Torbicki, MD<sup>1</sup>; Marisa Bacchi, PhD<sup>2</sup>; Marion Delcroix, MD<sup>3</sup>; Harrison W Farber, MD<sup>4</sup>; Hossein-Ardeschir Ghofrani, MD<sup>5</sup>; Brian Hennessy, MSc<sup>2</sup>; Pavel Jansa, MD<sup>6</sup>; Sanjay Mehta, MD<sup>7</sup>; Loïc Perchenet, PhD<sup>2</sup>; Tomas Pulido, MD<sup>8</sup>; Daniel Rosenberg, PhD<sup>2</sup>; Lewis J Rubin, MD<sup>9</sup>; BKS Sastry, MD<sup>10</sup>; Gérald Simonneau, MD<sup>11</sup>; Olivier Sitbon, MD<sup>11</sup>; Rogério Souza, MD<sup>12</sup>; Lee-Jen Wei, PhD<sup>13</sup>; Richard Channick\*, MD<sup>14</sup>; and Raymond Benza\*, MD<sup>15</sup>

\*Equal contribution.

<sup>1</sup>Centre of Postgraduate Medical Education, European Health Centre, ECZ-Otwock, Poland; <sup>2</sup>Actelion Pharmaceuticals Ltd, Allschwil, Switzerland; <sup>3</sup>University Hospitals Leuven, Leuven, Belgium; <sup>4</sup>Boston University School of Medicine, Boston; <sup>5</sup>University of Giessen and Marburg Lung Center, Giessen, Germany, member of the German Center of Lung Research, and Department of Medicine, Imperial College London, London, UK; <sup>6</sup>Charles University, Prague, Czech Republic; <sup>7</sup>Canada Respiriology Division London Health Sciences Centre, London, Ontario, Canada; <sup>8</sup>Ignacio Chávez National Heart Institute, Mexico City, Mexico ; <sup>9</sup>University of California, San Diego Medical School, California; <sup>10</sup>CARE Hospitals, Hyderabad, India ; <sup>11</sup>Université Paris-Sud, Hôpital de Bicêtre, Le Kremlin-Bicêtre, France; <sup>12</sup>INCOR Heart Institute, University of Sao Paulo, Sao Paulo, Brazil; <sup>13</sup>Harvard University, Boston, Massachusetts; <sup>14</sup>University of California Los Angeles, Los Angeles, CA, USA; <sup>15</sup>Allegheny General Hospital, Pittsburgh, Pennsylvania.

## Table of Contents

|                         |                                                                                                            |             |
|-------------------------|------------------------------------------------------------------------------------------------------------|-------------|
| Supplemental Table I    | SERAPHIN – List of Independent Ethics Committees and Institutional Review Boards                           | Pages 3-8   |
| Supplemental Table II   | REVEAL – List of Institutional Review Boards                                                               | Pages 9-10  |
| Supplemental Table III  | SERAPHIN eligibility criteria used for selection of the RAC                                                | Pages 11-12 |
| Supplemental Table IV   | SERAPHIN eligibility criteria adjusted for Sensitivity RAC-A                                               | Page 13     |
| Supplemental Table V    | Baseline characteristics of the patients in the analysis cohorts of REVEAL                                 | Pages 14-15 |
| Supplemental Table VI   | Sensitivity analyses of observed vs predicted mortality in SERAPHIN                                        | Page 16     |
| Supplemental Figure I   | Observed mortality comparisons between REVEAL patients included in the RAC and those excluded from the RAC | Page 17     |
| Supplemental References |                                                                                                            | Page 18     |

**Supplemental Table I. SERAPHIN – List of Independent Ethics Committees and Institutional Review**

**Boards**

| <b>Study Center</b> | <b>Independent Ethics Committee/Institutional Review Board</b>                                                            |
|---------------------|---------------------------------------------------------------------------------------------------------------------------|
| <b>Argentina</b>    |                                                                                                                           |
| 8001                | Comité Independiente de Etica para Ensayos en Farmacologia Clinic                                                         |
| 8005                |                                                                                                                           |
| 8007                |                                                                                                                           |
| 8008                |                                                                                                                           |
| 8009                |                                                                                                                           |
| 8010                |                                                                                                                           |
| 8001                | Comité de Revision Institucional - Sanatoria de la Trinidad Mitr                                                          |
| 8002                | Comité de Bioética de la Fundacion Favaloro (Bioethics Comité)                                                            |
| 8004                | Comité de Revision Institucional del Hospital Británico                                                                   |
| 8005                | Comité de Docencia e Investigacion del Hospital Italiano Garibaldi                                                        |
| 8007                | Comité de Docencia e Investigacion del Instituto de Cardiologia Corrientes                                                |
| 8008                | Comité de Revision de Interna del Hospital Privado Centro                                                                 |
| 8009                | Comité de Etica en Investigaciones Biomedicas - Sanatorio Otamendi y Miroli S.A.                                          |
| 8010                | Comite de Docencia e Investigacion del Hospital Italiano de Cordoba                                                       |
| <b>Australia</b>    |                                                                                                                           |
| 5001                | The Alfred Hospital Research & Ethics Unit                                                                                |
| 5002                | St. Vincent's Hospital Human Research Ethics Committee                                                                    |
| 5003                | Sydney Local Health District                                                                                              |
| 5004                | Redcliffe-Caboolture Health Service District Ethics Committee                                                             |
| <b>Austria</b>      |                                                                                                                           |
| 1001                | Ethikkommission der Medizinischen Universität Wien und des Allgemeinen Krankenhauses der Stadt Wien                       |
| <b>Belarus</b>      |                                                                                                                           |
| 3101                | Minsk Regional Clinical Hospital                                                                                          |
| 3102                | Vitebsk Regional Clinical Hospital                                                                                        |
| 3104                | LEC of the Republican Scientific-Practical Center "Cardiology"                                                            |
| <b>Belgium</b>      |                                                                                                                           |
| 1101                | Faculteit Geneeskunde Commissie voor Medische Ethiek/Klinisch Onderzoek                                                   |
| <b>Bulgaria</b>     |                                                                                                                           |
| All sites           | Ethics Committee for multi-centric trials                                                                                 |
| <b>Canada</b>       |                                                                                                                           |
| 9001                | Conjoint Health Research Ethics Board - Office of Medical Bioethics                                                       |
| 9002                | University Health Network, Research Ethics Board                                                                          |
| 9002                | Mount Sinai Hospital Research Ethics Board                                                                                |
| 9003                | University of Western Ontario Office of Research Ethics                                                                   |
| 9004                | IRB - Comite d'Ethique de la recherche                                                                                    |
| 9005                | University of British Columbia, Clinical Research Ethics Board Office                                                     |
| <b>Chile</b>        |                                                                                                                           |
| 8201                | Comite Etica - Científico del Servicio de Salud Metropolitano Central                                                     |
| 8201                | Comite de Etica de la Direccion de Investigacion de la Escuela de Medicina de la Pontificia Universidad Catolica de Chile |
| 8202                | Comité de Etica Científico del Servicio de Salud Metropolitano Occidente                                                  |

| <b>Study Center</b> | <b>Independent Ethics Committee/Institutional Review Board</b>                                                                                           |
|---------------------|----------------------------------------------------------------------------------------------------------------------------------------------------------|
| 8203                | Comitè De Etica Cientifico del Servicio de Salud Metropolitano Oriente                                                                                   |
| <b>China</b>        |                                                                                                                                                          |
| 5101                | Ethics Committee of Shanghai Pulmonary Hospital                                                                                                          |
| 5102, 5103          | Ethics Committee, Renji Hospital, School of Medicine, Shanghai Jiao Tong University                                                                      |
| 5104                | Ethics Committee of Zhongshan Hospital Fudan University                                                                                                  |
| 5105                | Ethic Committee of Peking Union Medical College Hospital for Clinical Trials                                                                             |
| 5106                | IEC of Beijing Anzhen Hospital of the Capital University of Medical Sciences                                                                             |
| 5107                | IEC of Chinese PLA General Hospital                                                                                                                      |
| 5108                | Ethic Committee of Guangdong General Hospital                                                                                                            |
| 5109                | IEC of The First Affiliated Hospital with Nanjing Medical University                                                                                     |
| <b>Colombia</b>     |                                                                                                                                                          |
| 8302                | Comité de Ética e Investigaciones Fundación Clínica Shaio                                                                                                |
| 8303                | Comite de Etica en Investigacion Fundacion Cardiovascular de Colombia                                                                                    |
| <b>Croatia</b>      |                                                                                                                                                          |
| 3002                | Središnje etičko povjerenstvo, Agencija za lijekove i medicinske proizvode (Central ethics committee, Agency for medicinal products and medical devices) |
| <b>Denmark</b>      |                                                                                                                                                          |
| 1201                | Den Videnskabsetiske Komité for Region Midtjylland                                                                                                       |
| <b>Finland</b>      |                                                                                                                                                          |
| All sites           | Etiska Kommitteerna                                                                                                                                      |
| <b>France</b>       |                                                                                                                                                          |
| All sites           | CPP Ile-de-France VII                                                                                                                                    |
| <b>Germany</b>      |                                                                                                                                                          |
| All sites - 1401    | Ethik-Kommission Fachbereich Medizin, Justus-Liebig- Universität                                                                                         |
| 1403                | Ethikkommission an der Medizinischen Fakultät Leipzig<br>Institut für klinische Pharmakologie                                                            |
| 1404                | Landesamt für Gesundheit und Soziales, Geschäftsstelle der Ethik-Kommission des Landes Berlin                                                            |
| 1406                | Ethik-Kommission der Medizinischen Fakultät der Universität zu Köln                                                                                      |
| 1408                | Ethikkommission Ärztekammer Hamburg, Körperschaft des Öffentlichen Rechts                                                                                |
| 1409                | Ethikkommission der Medizinischen Fakultät der TU Dresden                                                                                                |
| 1410                | Ethikkommission an der Medizinischen Fakultät, Ernst-Moritz-Arndt-Universität Greifswald, Institut für Pharmakologie                                     |
| 1411                | Ethik-Kommission der Medizinische Fakultät der Ludwigs-Maximilians Universität                                                                           |
| 1412                | Ethikkommission der Medizinischen Fakultät Heidelberg                                                                                                    |
| 1413                | Ethikkommission der Medizinischen Fakultät der Universität Regensburg                                                                                    |
| 1415                | Ethik-Kommission bei der Ärztekammer des Saarlandes                                                                                                      |
| <b>Hong Kong</b>    |                                                                                                                                                          |
| 5201                | Institutional Review Board of the University of Hong Kong/ Hospital Authority Hong Kong West Cluster                                                     |
| 5202                | Chinese University of Hong Kong - New Territories Ethics Committee                                                                                       |
| <b>Hungary</b>      |                                                                                                                                                          |
| All sites           | Egészségügyi Tudományos Tanács Klinikai Farmakológiai Etikai Bizottság (Medical Research Council Ethics Committee for Clinical Pharmacology)             |
| 3401                | Szegedi Tudományegyetem, Szent-Györgyi Albert Klinikai Központ Regionális és Intézményi Humán Orvosbiológiai Kutatásetikai Bizottsága                    |

| <b>Study Center</b> | <b>Independent Ethics Committee/Institutional Review Board</b>                                                                                      |
|---------------------|-----------------------------------------------------------------------------------------------------------------------------------------------------|
| 3404                | University of Pécs, Faculty of Medicine, Medical Microbiology and Immunity Institute, Regional Research Ethics Committee of the Medical Center      |
| 3405                | Gottsegen György Országos Kardiologiai Intézet Etikai Bizottsága                                                                                    |
| 3406                | Semmelweis Egyetem Intézeti Tudományos és Kutatásetikai Bizottság                                                                                   |
| <b>India</b>        |                                                                                                                                                     |
| 5301                | Ethics Committee Apollo Hospitals International Ltd                                                                                                 |
| 5302                | Institutional Ethics Committee- Deenanath Mangeshkar Hospital & Research Centre                                                                     |
| 5303                | Clinical Research & Ethics Committee, National Health & Education Society                                                                           |
| 5304                | Institutional Ethics Committee, Care Foundation                                                                                                     |
| 5305                | Ethical Research Committee-Narayana Hrudayalaya Institute of Medical Sciences                                                                       |
| 5306                | Institutional Ethics Committee, Maulana Azad Medical College, New Dehli                                                                             |
| 5307                | Ethics Committee For Research On Human Subjects                                                                                                     |
| <b>Israel</b>       |                                                                                                                                                     |
| 7101                | Helsinki Committee Carmel Medical Center                                                                                                            |
| 7102                | Helsinki Committee Rabin Medical Center                                                                                                             |
| 7103                | Prof. Amichai Rubin / Prof. Moshe Berant                                                                                                            |
| 7104                | The Helsinki Committee Chaim Sheba Medical Center                                                                                                   |
| 7105                | Helsinki Committee Kaplan Medical Center                                                                                                            |
| 7106                | The Helsinki Committee Tel Aviv Sourasky Medical Center                                                                                             |
| <b>Italy</b>        |                                                                                                                                                     |
| 1501                | Comitato Etico dell'Azienda Policlinico Umberto I di Roma - c/o Servizio Amministrativo Area Scientifica e di Ricerca                               |
| 1502                | Fondazione IRCCS, Policlinico "San Matteo" Comitato de Bioetico                                                                                     |
| <b>Malaysia</b>     |                                                                                                                                                     |
| 5401                | Ethics Committee Institut Jantung Negara                                                                                                            |
| <b>Mexico</b>       |                                                                                                                                                     |
| 8401                | Ethics Committee Instituto Nacional de Cardiología Ignacio Chavez<br>Comision de Investigacion del Instituto Nacional de Cardiología Igancio Chavez |
| 8402                | Comité de Ética e Investigación de la Unidad de Investigación Clínica en Medicina.                                                                  |
| <b>Netherlands</b>  |                                                                                                                                                     |
| All sites           | Verenigde Commissies Mensgebonden Onderzoek                                                                                                         |
| <b>Norway</b>       |                                                                                                                                                     |
| 1701                | Regional komité for medisinsk og helsefaglig forskningsetikk, Sør-Øst-Norge                                                                         |
| <b>Peru</b>         |                                                                                                                                                     |
| All sites           | Comite Institucional de Etica en Investigacion de la Universidad de San Martin de Porres - Clinical cada mujer                                      |
| 8501                | EC Facultad de Medicina Humana Uni de San Martin de Porres                                                                                          |
| 8502                | Comision Reguladora De Estudios Clinicos Del Completo Hospitalario San Pablo                                                                        |
| 8503                | Comite de Bioetica De La Red Asistencial Sabogal-Essalud Hospital Nacional Alberto Sabogal Sologuren, Essalud                                       |
| <b>Poland</b>       |                                                                                                                                                     |
| All sites           | Komisja ds. Etyki Badań Naukowych przy Instytucie Gruźlicy i Chorób Płuc                                                                            |

| <b>Study Center</b>       | <b>Independent Ethics Committee/Institutional Review Board</b>                                                                                                                                                         |
|---------------------------|------------------------------------------------------------------------------------------------------------------------------------------------------------------------------------------------------------------------|
| <b>Romania</b>            |                                                                                                                                                                                                                        |
| All sites                 | Comisia Nationala de Etica pentru Studiu Clinic al Medicamentului                                                                                                                                                      |
| <b>Russian Federation</b> |                                                                                                                                                                                                                        |
| All sites                 | Ethics Council at Minzdravsocrazvitiya                                                                                                                                                                                 |
| 3801                      | The Joint Local Ethics Committee of the Municipal Budgetary Healthcare Institution “Kemerovo Cardiology Dispensary”                                                                                                    |
| 3802                      | Committee on the Ethics issues in clinical cardiology of the Federal State Institution “Russian Cardiology Scientific and Production complex of Minzdravsotsrazvitiya of Russia”                                       |
| 3803                      | Biomedical Ethics Committee at Federal State Budgetary Institution “Scientific Research Institute of Cardiology” Siberian branch of RAMS                                                                               |
| 3804                      | Ethics Committee of the Regional Budgetary State Health Care Institution “Tomsk Regional Clinical Hospital”                                                                                                            |
| 3805                      | Committee on the Ethics of clinical trials of Sverdlovsk Regional Clinical Hospital #1                                                                                                                                 |
| 3806                      | Ethics Committee at the “Scientific Research Institute of Pulmonology” of Federal Medical and Biological Agency of Russia                                                                                              |
| 3807                      | Ethics Committee of the Municipal Health Care Institution of Yaroslavl Region "Clinical Hospital of Emergency Care named after N.V. Solovyov"                                                                          |
| 3808                      | Local Independent Ethic Committee of National Research Centre for Preventive Medicine                                                                                                                                  |
| 3809                      | Ethics committee on clinical trials of the City Clinical Hospital #1 N.I. Pirogov                                                                                                                                      |
| 3810                      | Ethics committee of St. Petersburg Medical Academy of Postgraduate Education                                                                                                                                           |
| 3811                      | Ethics Committee at the Federal State Budgetary Institution “Federal Center of heart, blood and endocrinology named after V.A.Almazov” of the Ministry of Health Care and Social Development of the Russian Federation |
| 3812                      | Ethics Committee of St. Petersburg State Medical University n.a. Pavlov                                                                                                                                                |
| <b>Serbia</b>             |                                                                                                                                                                                                                        |
| 3901                      | Univerzitetska dečja klinika, Etički odbor                                                                                                                                                                             |
| 3902                      | Kliničko Bolnički Centar Zemun, Etički Komitet                                                                                                                                                                         |
| 3903                      | Klinički Centar Srbije, Etički Odbor                                                                                                                                                                                   |
| <b>Singapore</b>          |                                                                                                                                                                                                                        |
| 5501                      | Singapore General Hospital Ethics Committee                                                                                                                                                                            |
| 5501                      | Singapore Health Services Pte Ltd. Domain C                                                                                                                                                                            |
| 5502                      | National Healthcare Group Domain Specific Review Board, Domain C                                                                                                                                                       |
| <b>Slovakia</b>           |                                                                                                                                                                                                                        |
| All sites                 | Etická komisia NÚSCH                                                                                                                                                                                                   |
| <b>South Africa</b>       |                                                                                                                                                                                                                        |
| 6001, 6002                | University of the Witwatersrand Human Research Ethics Committee                                                                                                                                                        |
| 6003                      | Pharma Ethics (Pty) Ltd                                                                                                                                                                                                |
| 6004                      | University of Stellenbosch Committee for Clinical Trials                                                                                                                                                               |
| <b>Spain</b>              |                                                                                                                                                                                                                        |
| All sites                 | Hospital Vall d' Hebrón, Fundacio per la Recerca                                                                                                                                                                       |
| 1902                      | Comité Etico de Investigacion Clinica                                                                                                                                                                                  |
| 1904                      | Comité Etico de Investigacion Clinica                                                                                                                                                                                  |
| 1907                      | Comité Etico de Investigacion Clinica                                                                                                                                                                                  |

| <b>Study Center</b>   | <b>Independent Ethics Committee/Institutional Review Board</b>                                                                                           |
|-----------------------|----------------------------------------------------------------------------------------------------------------------------------------------------------|
| <b>Sweden</b>         |                                                                                                                                                          |
| All sites             | Regionala Etikprövningsnämnden i Uppsala                                                                                                                 |
| <b>Taiwan</b>         |                                                                                                                                                          |
| 5601                  | Research Ethics Committee National Taiwan University Hospital                                                                                            |
| 5602                  | The Institutional Review Board of Taichung Veterans General Hospital                                                                                     |
| 5602 - central        | Joint Institutional Review Board                                                                                                                         |
| <b>Thailand</b>       |                                                                                                                                                          |
| 5701                  | Ethical Clearance Committee on Human Rights Related to Researches Involving Human Subjects Faculty of Medicine, Ramathibodi Hospital, Mahidol University |
| 5702                  | Ethics Committee Faculty of Medicine Siriraj Hospital, Mahidol University                                                                                |
| 5703                  | Research Ethics Committee, Faculty of Medicine, Chiang Mai University                                                                                    |
| 5704                  | The Khon Kaen University Ethics Committee for Human Research                                                                                             |
| <b>Turkey</b>         |                                                                                                                                                          |
| All sites             | Hacettepe Üniversitesi Tıp Fakültesi Tibbi, Cerrahi ve Ilac Arastirmalari Etik Kurulu                                                                    |
| <b>Ukraine</b>        |                                                                                                                                                          |
| All sites             | Central Ethics Committee of the Health Ministry of Ukraine                                                                                               |
| 4101                  | Bioethics Committee affiliated to Dnepropetrovsk State Medical Academy                                                                                   |
| 4102                  | Local Ethic Committee of Lviv Regional Clinical Hospital                                                                                                 |
| <b>United Kingdom</b> |                                                                                                                                                          |
| 2101                  | London – Hampstead (Formerly: EC Royal Free Hospital & Medical School Research Ethics Committee)                                                         |
| <b>USA</b>            |                                                                                                                                                          |
| 9101                  | Colorado Multiple IRB                                                                                                                                    |
| 9102                  | IRB - Columbia University Medical Center                                                                                                                 |
| 9103                  | IRB - Western                                                                                                                                            |
| 9104                  | IRB - Western                                                                                                                                            |
| 9105                  | IRB - Mayo Clinic Foundation                                                                                                                             |
| 9106                  | IRB - Western                                                                                                                                            |
| 9107                  | IRB - Louisiana State University Health Sciences Center                                                                                                  |
| 9108                  | IRB - Intermountain Healthcare Urban Central Region                                                                                                      |
| 9109                  | IRB - Western                                                                                                                                            |
| 9110                  | IRB - Boston University Medical Center                                                                                                                   |
| 9111                  | IRB - Western                                                                                                                                            |
| 9112                  | IRB - Western                                                                                                                                            |
| 9114                  | IRB – Western                                                                                                                                            |
| 9115                  | IRB - The University of Michigan Medical School                                                                                                          |
| 9116                  | IRB - Western                                                                                                                                            |
| 9118                  | IRB – Western                                                                                                                                            |
| 9119                  | IRB - UTHSC-Committee for the Protection of Human Subjects                                                                                               |
| 9121                  | IRB - Wayne State University - Human Investigation Committee                                                                                             |
| 9123                  | IRB - University of California San Diego Human Research Protections Program                                                                              |
| 9125                  | IRB - University of Kansas Medical Center - Human Subjects Committee                                                                                     |
| 9126                  | IRB - Washington University School of Medicine - Human Research Protect. Office                                                                          |
| 9127                  | IRB - Western                                                                                                                                            |
| 9128                  | IRB - Baylor College of Medicine                                                                                                                         |
| 9129                  | IRB - The University of Chicago - Section of Regulatory Compliance                                                                                       |

| <b>Study Center</b> | <b>Independent Ethics Committee/Institutional Review Board</b>                     |
|---------------------|------------------------------------------------------------------------------------|
| 9130                | IRB - University of Maryland School of Medicine - Human Research Protection Office |
| 9131                | IRB - Cottage Health System                                                        |
| 9132                | IRB - Western                                                                      |
| 9133                | IRB – Duke                                                                         |
| 9134                | IRB - Partners Human Research Committee (Boston)                                   |
| 9135                | IRB - Maine Medical Center - Office of Research Affairs                            |
| 9136                | IRB – Aurora                                                                       |
| 9137                | IRB – Western                                                                      |
| 9138                | IRB - Vanderbilt University                                                        |
| 9139                | IRB - Veterans Affairs Greater Los Angeles Healthcare System - 151                 |
| 9140                | IRB - University of Texas Southwestern Medical Center at Dallas                    |
| 9142                | IRB - Allegheny General Hosp                                                       |
| 9143                | IRB - Western                                                                      |

IEC, Independent Ethics Committee; IRB, Institutional Review Board



**Supplemental Table II. REVEAL – List of Institutional Review Boards**

| <b>Study Center</b>                                                     | <b>Institutional Review Board</b>                                                     |
|-------------------------------------------------------------------------|---------------------------------------------------------------------------------------|
| Intermountain Medical Center                                            | Intermountain Healthcare Urban Central Region IRB                                     |
| Allegheny General Hospital                                              | ASRI- WPAHS IRB                                                                       |
| University of Pittsburgh Medical Center<br>Cardiovascular Institute     | WIRB                                                                                  |
| Oregon Health and Science University (up<br>to 06Jun2008)               | Oregon Health and Science University IRB                                              |
| Legacy Good Samaritan Hospital and<br>Health Center (after 06 Jun 2008) | WIRB                                                                                  |
| Inova Fairfax Hospital                                                  | WIRB                                                                                  |
| Kalamazoo Center for Medical Studies                                    | Spectrum Health IRB                                                                   |
| University of Colorado Health Sciences<br>Center                        | Colorado Multiple IRB                                                                 |
| Mayo Clinic Rochester                                                   | Mayo Clinic Office for Human Research IRB                                             |
| Baylor College of Medicine                                              | Institutional Review Board for Baylor College of<br>Medicine and Affiliated Hospitals |
| Midwest Heart Specialists                                               | WIRB                                                                                  |
| Georgia Health Sciences University                                      | Human Assurance Committee                                                             |
| Aurora St. Luke's Medical Center                                        | Aurora IRB                                                                            |
| University of Alabama at Birmingham                                     | WIRB                                                                                  |
| The University of Texas Health Science<br>Center at San Antonio         | The University of Texas Health Science Center IRB                                     |
| University of Iowa Hospital and Clinics                                 | Human Subjects Office/ IRB/ Hawk IRB                                                  |
| University of Colorado School of Medicine                               | Colorado Multiple IRB                                                                 |
| University of California, San Diego                                     | UCSD Human Research Protections Programs                                              |
| Ochsner Clinic Foundation                                               | Ochsner Clinic Foundation IRB                                                         |
| Rhode Island Hospital                                                   | Lifespan Rhode Island IRB                                                             |
| University of Maryland                                                  | University of Maryland IRB                                                            |
| Temple University                                                       | Temple University IRB                                                                 |
| Brigham and Women's Hospital                                            | Brigham Women's Hospital IRB                                                          |
| Mayo Clinic Florida                                                     | Mayo Clinic Office for Human Research IRB                                             |
| University of California, San Francisco                                 | Human Research Protection Program                                                     |
| North Shore-Long Island Jewish Health<br>Systems                        | BRANY IRB                                                                             |
| VA Greater Los Angeles Healthcare<br>System                             | VA Greater Los Angeles Healthcare Systems IRB                                         |
| University of Rochester                                                 | University of Rochester Research Subjects Review<br>Board                             |
| Washington University in St. Louis                                      | Washington University Human Research Protection<br>Office                             |
| Suncoast Lung Center                                                    | WIRB                                                                                  |
| Wayne State University                                                  | Wayne State University IRB                                                            |
| Duke University Medical Center                                          | Duke University Health System IRB                                                     |
| University of Pennsylvania                                              | University of Pennsylvania IRB                                                        |
| University of Arizona                                                   | University of Arizona Human Subjects Protection<br>Program                            |

| <b>Study Center</b>                       | <b>Institutional Review Board</b>                                            |
|-------------------------------------------|------------------------------------------------------------------------------|
| University of Minnesota Medical Center    | University of Minnesota Research Subjects' Protection Programs IRB           |
| Boston University Medical Center          | WIRB                                                                         |
| Nationwide Children's Hospital            | Nationwide Children's Hospital IRB                                           |
| Johns Hopkins University                  | WIRB                                                                         |
| Cleveland Clinic                          | Cleveland Clinic Foundation IRB                                              |
| Columbia University Medical Center        | Columbia University Medical Center IRB                                       |
| University of Chicago                     | The University of Chicago AURA IRB                                           |
| Medical University of South Carolina      | The Medical University of South Carolina IRB for Human Research              |
| Texas Children's Hospital                 | IRB for Baylor College of Medicine and Affiliated Hospitals                  |
| Tufts-New England Medical Center Hospital | Tufts Health Sciences Campus Institutional Review Board                      |
| Lexington Pulmonary and Critical Care     | WIRB                                                                         |
| Stanford University Medical Center        | Stanford University IRB                                                      |
| Monroe Carell Jr. Children's Hospital     | Vanderbilt University IRB                                                    |
| Vanderbilt Medical Center                 | Vanderbilt University IRB                                                    |
| Ohio State University                     | Ohio State University Biomedical Sciences IRB                                |
| Kentuckiana Pulmonary Associates          | WIRB                                                                         |
| University of California, Los Angeles     | UCLA Medical IRB                                                             |
| University Hospitals of Cleveland         | University Hospitals Case Medical Center (UHCMC) IRB for Human Investigation |
| Beth Israel Medical Center                | Beth Israel Medical Center IRB                                               |
| Harbor UCLA Medical Center                | Los Angeles Biomedical Research Institution                                  |
| Seattle Children's Hospital               | Children's Hospital and Regional Medical Center Seattle, Washington IRB      |
| Virginia Commonwealth University          | WIRB                                                                         |
| University of Florida                     | WIRB                                                                         |

IRB, Institutional Review Board; WIRB, Western Institutional Review Board

**Supplemental Table III. SERAPHIN eligibility criteria used for selection of the RAC**

| SERAPHIN eligibility criteria <sup>1</sup>                                                                                                                                                                                  | Collected in REVEAL at baseline | Eligibility criteria used for selection of RAC                            |
|-----------------------------------------------------------------------------------------------------------------------------------------------------------------------------------------------------------------------------|---------------------------------|---------------------------------------------------------------------------|
|                                                                                                                                                                                                                             | Yes/No                          | Yes/No                                                                    |
| <b>Inclusion criteria</b>                                                                                                                                                                                                   |                                 |                                                                           |
| Males and females aged $\geq 12$ years at enrollment                                                                                                                                                                        | Yes                             | Yes                                                                       |
| WHO FC II-IV at enrollment                                                                                                                                                                                                  | Yes                             | No: Controlled via the prediction model                                   |
| PAH belonging to Groups 1.1 to 1.3 of the Venice classification: Idiopathic, Familial, related to CTD, simple congenital systemic-to-pulmonary shunts, HIV infection, or Drugs and toxins                                   | Yes                             | Yes                                                                       |
| mPAP $>25$ mmHg (within 1 year of enrollment)                                                                                                                                                                               | Yes                             | Yes                                                                       |
| PAWP $\leq 15$ mmHg (within 1 year of enrollment)                                                                                                                                                                           | Yes                             | Yes                                                                       |
| PVR at rest $>320$ dyn $\cdot$ sec $\cdot$ cm <sup>-5</sup>                                                                                                                                                                 | Yes                             | Yes                                                                       |
| 6MWD $\geq 50$ m at enrollment                                                                                                                                                                                              | Yes                             | Yes                                                                       |
| <b>Exclusion criteria</b>                                                                                                                                                                                                   |                                 |                                                                           |
| PAH associated with portal hypertension thyroid disorders, glycogen storage disease, Gaucher's disease, hereditary hemorrhagic telangiectasia, hemoglobinopathies, myeloproliferative disorders, or splenectomy             | Yes                             | Yes                                                                       |
| PAH associated with non-corrected simple congenital systemic-to-pulmonary shunts and, combined and complex systemic-to-pulmonary shunts, corrected or non-corrected                                                         | Yes                             | Yes                                                                       |
| PAH associated with significant venous or capillary involvement (PAWP $>15$ mmHg), known pulmonary veno-occlusive disease, and pulmonary capillary hemangiomatosis                                                          | Yes                             | Yes                                                                       |
| Persistent pulmonary hypertension of the newborn                                                                                                                                                                            | Yes                             | Yes                                                                       |
| Pulmonary hypertension belonging to Groups 2 to 5 of the Venice classification                                                                                                                                              | Yes                             | Yes                                                                       |
| Moderate to severe obstructive lung disease: forced expiratory volume in 1 second/forced vital capacity (FEV <sub>1</sub> /FVC) $<70\%$ and FEV <sub>1</sub> $<65\%$ of predicted value after bronchodilator administration | Yes                             | Yes                                                                       |
| Moderate to severe restrictive lung disease: total lung capacity $<60\%$ of normal predicted value                                                                                                                          | No                              | No: Not collected in REVEAL                                               |
| Moderate to severe hepatic impairment, e.g. Child-Pugh Class B or C                                                                                                                                                         | Yes                             | No; Related to the safety profile of ERAs known at the start of SERAPHIN* |
| Estimated creatinine clearance $<30$ mL/min                                                                                                                                                                                 | Yes                             | Yes                                                                       |

|                                                                                                                                                                               |     |                                                                                          |
|-------------------------------------------------------------------------------------------------------------------------------------------------------------------------------|-----|------------------------------------------------------------------------------------------|
| Serum aspartate aminotransferase and/or alanine aminotransferase > 1.5 times the upper limit of normal                                                                        | No  | No: Not collected in REVEAL                                                              |
| Haemoglobin <75 % of the lower limit of the normal range                                                                                                                      | No  | No: Not collected in REVEAL                                                              |
| Systolic blood pressure <100 mmHg                                                                                                                                             | Yes | Yes                                                                                      |
| Acute or chronic impairment (other than dyspnea), limiting the ability to comply with the study requirements                                                                  | Yes | No: Considered too subjective                                                            |
| Pregnant or breast-feeding                                                                                                                                                    | No  | No: Not collected in REVEAL                                                              |
| Known concomitant life-threatening disease with a life expectancy <12 months                                                                                                  | Yes | No: Considered too subjective                                                            |
| Body weight <40 kg                                                                                                                                                            | Yes | Yes                                                                                      |
| Any condition that prevented compliance with the protocol or adherence to therapy                                                                                             | Yes | No: Considered too subjective                                                            |
| Recently started (<8 weeks prior to randomization) or planned cardio-pulmonary rehabilitation program based on exercise                                                       | No  | No: Not collected in REVEAL                                                              |
| Treatment with ERAs within 3 months prior to randomization                                                                                                                    | Yes | No: Use of background PAH therapies not considered for selection of the RAC              |
| Systemic treatment within 4 weeks prior to randomization with immunosuppressants: calcineurin, or mTOR inhibitors (e.g. cyclosporine A and tacrolimus, everolimus, sirolimus) | Yes | No: Related to potential DDIs with macitentan that were unknown at the start of SERAPHIN |
| Treatment with CYP3A inducers within 4 weeks prior to randomization                                                                                                           | Yes | No: Related to known DDIs with macitentan                                                |
| Known hypersensitivity to drugs of the same class as the study drug, or any of their excipients                                                                               | Yes | No: Considered too subjective                                                            |
| Planned treatment or treatment with another investigational drug within 1 month prior to randomization                                                                        | No  | No: Not collected in REVEAL                                                              |

\*Macitentan must not be initiated in patients with severe hepatic impairment, or clinically significant elevated hepatic aminotransferases (greater than 3 times the Upper Limit of Normal [ $> 3 \times \text{ULN}$ ])<sup>2</sup>. 6MWD, 6-minute walk distance; CTD, connective tissue disease; CYP3A, cytochrome P450 Family 3A; DDI, drug-drug interaction; ERA, endothelin receptor antagonist; FEV1, forced expiratory volume in 1 second; FVC, forced vital capacity; HIV, human immunodeficiency virus; mPAP, mean pulmonary arterial pressure; mTOR, mammalian target of rapamycin; PAH, pulmonary arterial hypertension; PAWP, pulmonary artery wedge pressure; PVR, pulmonary vascular resistance; RAC, REVEAL analysis cohort; SD, standard deviation; WHO FC, World Health Organization functional class.

**Supplemental Table IV. SERAPHIN eligibility criteria adjusted for Sensitivity RAC-A**

| <b>Parameter</b>          | <b>SERAPHIN eligibility criteria</b> | <b>Adjusted criteria threshold</b> |
|---------------------------|--------------------------------------|------------------------------------|
| <b>Inclusion criteria</b> |                                      |                                    |
| mPAP                      | >25 mmHg                             | >20 mmHg                           |
| PAWP                      | ≤15 mmHg                             | ≤23 mmHg                           |
| PVR                       | >320 dyn·sec·cm <sup>-5</sup>        | >84.8 dyn·sec·cm <sup>-5</sup>     |
| <b>Exclusion criteria</b> |                                      |                                    |
| SBP                       | <100 mmHg                            | <90 mmHg                           |
| Body weight               | <40 kg                               | <36.5 kg                           |

mPAP, mean pulmonary arterial pressure; PAWP, pulmonary artery wedge pressure; PVR, pulmonary vascular resistance; RAC, REVEAL analysis cohort; SBP, systolic blood pressure.

**Supplemental Table V. Baseline characteristics of the patients in the analysis cohorts of REVEAL**

| Variable                                | REVEAL RAC     | REVEAL Ex-RAC   | REVEAL Sensitivity RAC-A | REVEAL Ex-Sensitivity RAC-A | REVEAL Sensitivity RAC-B | REVEAL Ex-Sensitivity RAC-B |
|-----------------------------------------|----------------|-----------------|--------------------------|-----------------------------|--------------------------|-----------------------------|
|                                         | <b>n = 734</b> | <b>n = 2781</b> | <b>n = 1013</b>          | <b>n = 2502</b>             | <b>n = 391</b>           | <b>n = 343</b>              |
| Female, n (%)                           | 595 (81.1)     | 2132 (76.7)     | 829 (81.8)               | 1898 (75.9)                 | 311 (79.5)               | 284 (82.8)                  |
| Age, years, mean±SD                     | 52.3±14.7      | 50.8±17.3       | 52.4±14.9                | 50.6±17.5                   | 51.9±15.1                | 52.7±14.4                   |
| SBP, mmHg, mean±SD                      | 120.3±14.9     | 115.8±18.2      | 118.1±16.6               | 116.2±18.1                  | 121.0±14.7               | 119.4±15.0                  |
| Heart rate, bpm, mean±SD                | 84.0±14.7      | 83.0±15.3       | 83.8±14.8                | 82.9±15.3                   | 84.8±15.4                | 83.2±13.8                   |
| BMI, kg/m <sup>2</sup> , mean±SD        | 28.8±6.4       | 27.8±7.5        | 28.9±6.7                 | 27.6±7.5                    | 28.5±6.1                 | 29.1±6.7                    |
| SvO <sub>2</sub> , %, mean±SD           | 62.8±9.5       | 64.6±9.9        | 63.4±9.6                 | 64.5±10.0                   | 62.2±10.0                | 63.4±9.1                    |
| PVR, dyn·sec·cm <sup>-5</sup> , mean±SD | 888±520        | 797±579         | 816±507                  | 820±588.2                   | 911±517                  | 861±478                     |
| mRAP, mmHg, mean±SD                     | 9.1±5.5        | 9.1±5.5         | 9.1±5.5                  | 9.0±5.4                     | 9.2±5.4                  | 8.9±5.5                     |
| Borg Index, mean±SD                     | 3.1±2.0        | 3.1±2.1         | 3.2±2.1                  | 3.0±2.0                     | 3.1±2.0                  | 3.1±2.0                     |
| 6MWD, m, mean±SD                        | 359±125.2      | 361±129.1       | 362±123.5                | 350±130.7                   | 354.1±127.8              | 365.4±122.2                 |
| WHO FC, n (%)                           |                |                 |                          |                             |                          |                             |
| I                                       | 56 (7.6)       | 182 (7.5)       | 79 (7.8)                 | 159 (7.4)                   | 31 (7.9)                 | 25 (7.3)                    |
| II                                      | 263 (35.8)     | 846 (34.9)      | 375 (37.0)               | 734 (34.2)                  | 129 (33.0)               | 134 (39.1)                  |
| III                                     | 377 (51.4)     | 1216 (50.2)     | 504 (49.8)               | 1089 (50.8)                 | 206 (52.7)               | 171 (49.9)                  |
| IV                                      | 38 (5.2)       | 180 (7.4)       | 55 (5.4)                 | 163 (7.6)                   | 25 (6.4)                 | 13 (3.8)                    |
| Missing                                 | 0              | 357             | 0                        | 357                         | 0                        | 0                           |
| Use of medications for PAH, n (%)       |                |                 |                          |                             |                          |                             |
| Yes                                     | 644 (87.7)     | 2181 (78.4)     | 891 (88.0)               | 1934 (77.3)                 | 301 (77)                 | 343 (100)                   |
| PAH classification, n (%)               |                |                 |                          |                             |                          |                             |
| Idiopathic                              | 382 (52.0)     | 1263 (45.4)     | 515 (50.8)               | 1130 (45.2)                 | 215 (55.0)               | 167 (48.7)                  |

|                                         |            |            |            |            |            |            |
|-----------------------------------------|------------|------------|------------|------------|------------|------------|
| Heritable                               | 32 (4.4)   | 65 (2.3)   | 41 (4.1)   | 56 (2.2)   | 13 (3.3)   | 19 (5.5)   |
| Associated with CTD                     | 220 (30.0) | 670 (24.1) | 314 (31.0) | 576 (23.0) | 117 (29.9) | 103 (30.0) |
| Associated with congenital shunts       | 42 (5.7)   | 332 (11.9) | 58 (5.7)   | 316 (12.6) | 18 (4.6)   | 24 (7.0)   |
| Associated with HIV infection           | 10 (1.4)   | 50 (1.8)   | 14 (1.4)   | 46 (1.8)   | 3 (0.8)    | 7 (2.0)    |
| Associated with drug use/toxin exposure | 48 (6.5)   | 128 (4.6)  | 71 (7.0)   | 105 (4.2)  | 25 (6.4)   | 23 (6.7)   |
| Other                                   | 0          | 273 (9.8)  | 0          | 273 (10.9) | 0          | 0          |
| Geographical region, n (%)              |            |            |            |            |            |            |
| North America (inc. Canada)             | 734 (100)  | 2781 (100) | 1013 (100) | 2502 (100) | 391 (100)  | 343 (100)  |
| Rest of World                           | 0          | 0          | 0          | 0          | 0          | 0          |

6MWD, 6-minute walk distance; BMI, body mass index; bpm, beats per minute; CTD, connective tissue disease; ex-RAC, patients excluded from the REVEAL analysis cohort; ex-Sensitivity RAC-A, patients excluded from the REVEAL sensitivity analysis cohort A; ex-Sensitivity RAC-B, patients excluded from the REVEAL sensitivity analysis cohort B; HIV, human immunodeficiency virus; mRAP, mean right atrial pressure; PAH, pulmonary arterial hypertension; PVR, pulmonary vascular resistance; RAC, REVEAL analysis cohort; Sensitivity RAC, REVEAL sensitivity analysis cohort; SBP, systolic blood pressure; SvO<sub>2</sub>, mixed venous oxygen saturation; WHO FC, World Health Organization functional class.

**Supplemental Table VI. Sensitivity analyses of observed vs predicted mortality in SERAPHIN**

| <b>Sensitivity Analyses</b>                                                      | <b>Placebo vs predicted HR (95% CI)</b> | <b>Macitentan 10 mg vs predicted HR (95% CI)</b> |
|----------------------------------------------------------------------------------|-----------------------------------------|--------------------------------------------------|
| 1) Baseline PAH therapy included as a covariate in the survival prediction model | 0.89 (0.64, 1.17)                       | 0.65 (0.46, 0.91)                                |
| 2) Sensitivity RAC-A used to develop survival prediction model                   | 0.90 (0.67, 1.22)                       | 0.69 (0.50, 0.97)                                |
| 3) Sensitivity RAC-B used to develop survival prediction model                   | 0.88 (0.66, 1.19)                       | 0.68 (0.48, 0.95)                                |

Sensitivity analyses of observed mortality for patients receiving placebo or macitentan 10 mg in SERAPHIN compared with predicted mortality for the overall SERAPHIN patient population had they received real-world treatment. Sensitivity analysis performed using: 1) RAC ( $n = 734$ ) to develop the survival prediction model with baseline PAH therapy included as a covariate, 2) Sensitivity RAC-A ( $n = 1013$ ), comprising the 734 RAC patients and an additional 279 REVEAL patients who were included after the thresholds for some criteria were adjusted to reflect the enrolled SERAPHIN population, to develop the survival prediction model, or 3) Sensitivity RAC-B comprising the 391 RAC patients who were not receiving ERA therapy at baseline to develop the survival prediction model. CI, confidence interval; ERA, endothelin receptor antagonist; HR, hazard ratio; RAC, REVEAL analysis cohort.



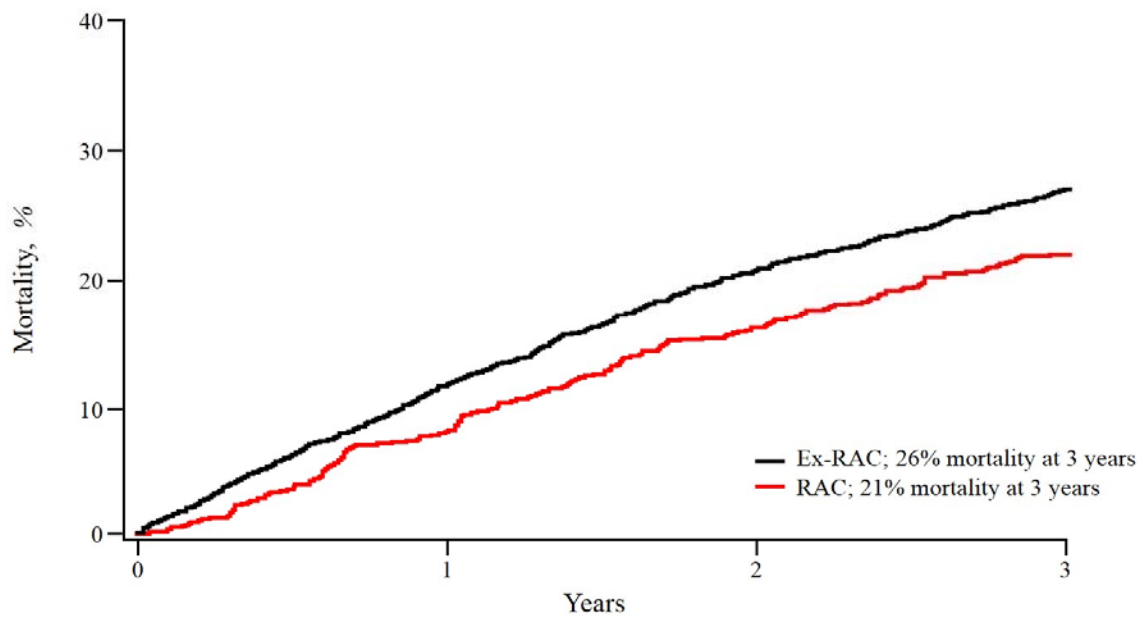

**Supplemental Figure I. Observed mortality comparisons between REVEAL patients included in the RAC and those excluded from the RAC**

RAC:  $n = 734$ ; Ex-RAC:  $n = 2781$ .

Ex-RAC, Patients excluded from the REVEAL analysis cohort; RAC, REVEAL analysis cohort.

## SUPPLEMENTAL REFERENCES

1. Pulido T, Adzerikho I, Channick RN, Delcroix M, Galie N, Ghofrani HA, Jansa P, Jing ZC, Le Brun FO, Mehta S, Mittelholzer CM, Perchenet L, Sastry BK, Sitbon O, Souza R, Torbicki A, Zeng X, Rubin LJ, Simonneau G and Investigators S. Macitentan and morbidity and mortality in pulmonary arterial hypertension. *N Engl J Med.* 2013;369:809-18. doi: 10.1056/NEJMoa1213917
2. Opsumit® (macitentan). *US Prescribing Information, March.* 2017. doi: <https://opsumit.com/opsumit-prescribing-information.pdf>. Date last accessed March 2018
