# Supplementary material for: Integrating Data From Randomized Controlled Trials and Observational Studies to Assess Survival in Rare Diseases: Insights From Pulmonary Arterial Hypertension
Source: PubMed Central journal article supplement — Circ Cardiovasc Qual Outcomes. 2019 May 21;12(5):e005095. doi: 10.1161/CIRCOUTCOMES.118.005095 (PMC7665498; doi:10.1161/circoutcomes.118.005095), 2019-05-21
Supplement: hcq-12-e005095-s002.pdf [file hcq-12-e005095-s002.pdf]

## Laura Corbett

---

**From:** Permissions <permissions@mms.org>  
**Sent:** 26 March 2019 14:37  
**To:** Laura Corbett  
**Subject:** RE: Query regarding re-use of data

Dear Laura,

NEJM authors do not need to request a license to reuse their own material in another journal article. As a courtesy, NEJM permits its authors to reuse their own material in certain manners, without having to seek a license to do so. The NEJM author may find this information at <https://www.nejm.org/author-center/permissions>

Thank you,

David Charlton  
NEJM Permissions

---

**From:** Laura Corbett <Laura.Corbett@NSPM.COM>  
**Sent:** Tuesday, March 26, 2019 10:34 AM  
**To:** Permissions <permissions@mms.org>  
**Cc:** Ruth Lloyd <ruth.lloyd@nspm.com>  
**Subject:** Query regarding re-use of data

Dear Sir/Madam,

I am writing on behalf of the authors of the NEJM published article “Macitentan and morbidity and mortality in pulmonary arterial hypertension” (*N Engl J Med.* 2013;369:809-818) with a query about re-using data.

The authors wish to reuse data from one of the tables in this manuscript in a new manuscript – could you please confirm that this is ok in accordance with the author permissions granted by the NEJM (detailed below) (and that no formal licence to reuse the material is required)?

- *“the New England Journal of Medicine (NEJM) is pleased to grant authors rights to reuse published versions of their articles, including portions, such as figures and tables, in book chapters or other educational articles written by author”*

The authors have provided a reference to the original article as follows: “From the New England Journal of Medicine, Pulido T, Adzerikho I, Channick RN, Delcroix M, Galiè N, Ghofrani HA, Jansa P, Jing ZC, Le Brun FO, Mehta S, Mittelholzer CM, Perchenet L, Sastry BK, Sitbon O, Souza R, Torbicki A, Zeng X, Rubin LJ, Simonneau G, Macitentan and morbidity and mortality in pulmonary arterial hypertension, 809, 809-818. Copyright © (2013) Massachusetts Medical Society. Reprinted with permission.”

Many thanks,

Laura

Laura Corbett, PhD | Associate Medical Writer  
[Laura.Corbett@NSPM.COM](mailto:Laura.Corbett@NSPM.COM)  
Phone +44 161 491 9909  
Mobile +44 7732 603 282

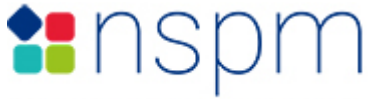

Collaborate. Communicate. **Differentiate.**

Strategic medical communications  
Medical writing & content development  
Project & event management

**nspm UK Ltd** | Cheadle Institute  
1 Cheadle Green | SK8 2BD Cheadle, Cheshire | United Kingdom  
Phone +44 161 491 7920 | Fax +44 161 241 4845  
[www.nspm.com](http://www.nspm.com)  
certified to standard ISO 9001

Co. Reg. 6634030

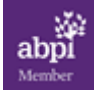

nspm UK is a  
General Associate  
Member of the ABPI

LEGAL NOTICE: This electronic mail and its content, including attachments, may contain confidential and/or privileged/copyrighted information and is intended only for the named recipient(s). If you are not the intended recipient, please contact the sender and delete this email. Any unauthorized use of the information contained in this message is prohibited. Please consider the environment before you print this e-mail.
